# Supplementary material for: Memantine selectively prevented the induction of dynamic allodynia by blocking Kir2.1 channel and inhibiting the activation of microglia in spinal dorsal horn of mice in spared nerve injury model
Source: PubMed Central journal article supplement — Mol Pain. 2019 Apr 26;15:1744806919838947. doi: 10.1177/1744806919838947 (PMC6487752; doi:10.1177/1744806919838947), 2019-04-26
Supplement: Supplemental_Material.pdf [file Supplemental_Material.pdf]

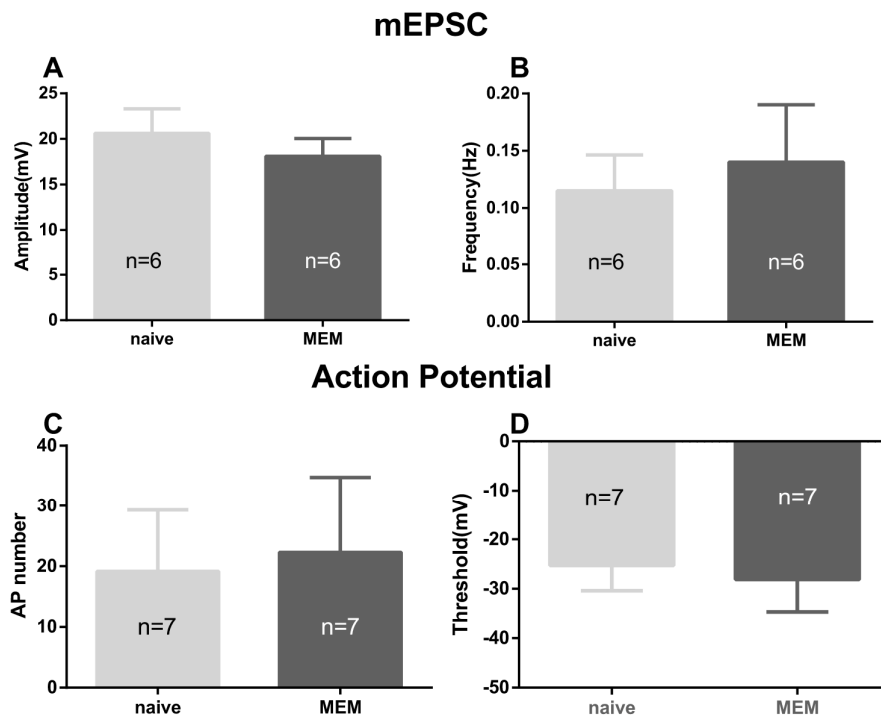

Supplementary Figure 1

Bath application of MEM- 50  $\mu$  M on the mEPSC and AP on the dorsal spinal cord neurons.

A-B: Results exhibited no mEPSC (Amplitude,  $p=0.2364$ ; and Frequency,  $p= 0.3724$ ) changes after MEM bath application. C-D: Results exhibited no AP (number,  $p=0.3460$ ; and Threshold,  $p=0.1305$ ) changes after MEM bath application. (paired t-test). Graphs represent the mean response  $\pm$  SEM.

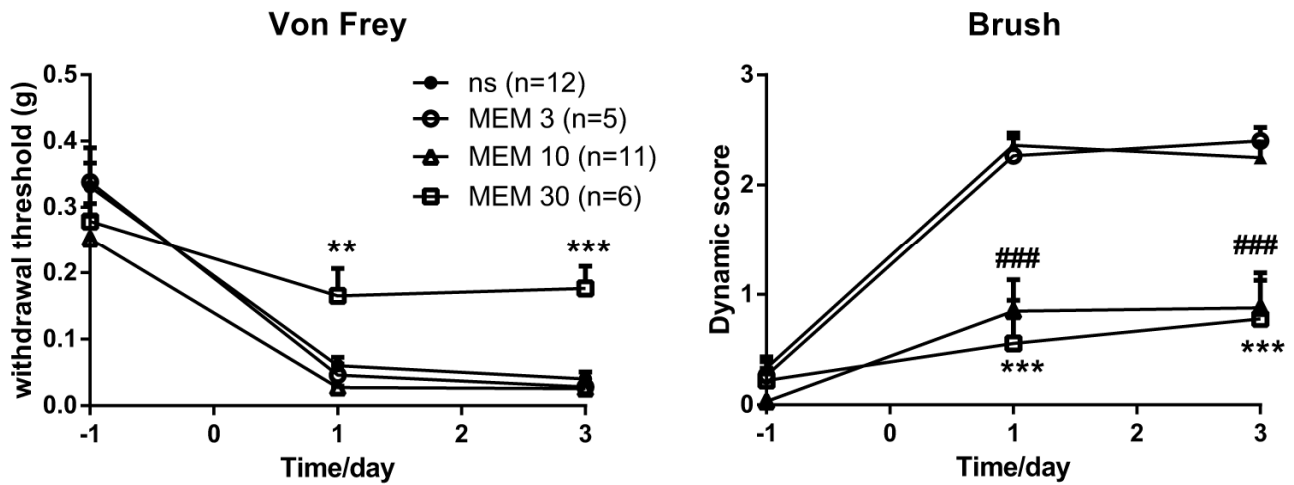

## Supplementary Figure 2

Effects of intrathecal a series of dose of MEM (3, 10, 30) following SNI.

MEM-3 exerted no effects on the induction of dynamic allodynia (two-way ANOVA with Bonferroni posthoc,  $p > 0.9999$ ) and punctate allodynia (two-way ANOVA with Bonferroni posthoc,  $p > 0.9999$ ). Pretreatment with MEM-30 prevented the induction of punctate allodynia (two-way ANOVA with Bonferroni posthoc, vehicle vs MEM-30,  $p = 0.0039$ ) and dynamic allodynia (two-way ANOVA with Bonferroni posthoc, vehicle vs MEM-30,  $p = 0.0001$ ). Only MEM-10 selectively inhibited the induction of dynamic allodynia (two-way ANOVA with Bonferroni posthoc,  $p = 0.0038$ ) but not punctate allodynia (two-way ANOVA with Bonferroni posthoc,  $p = 0.1702$ ). Graphs represent the mean response  $\pm$  SEM. \*\*,  $p < 0.01$ ; \*\*\*,  $p < 0.001$ , MEM-30 vs vehicle group. ###,  $p < 0.001$ , MEM-10 vs vehicle group.

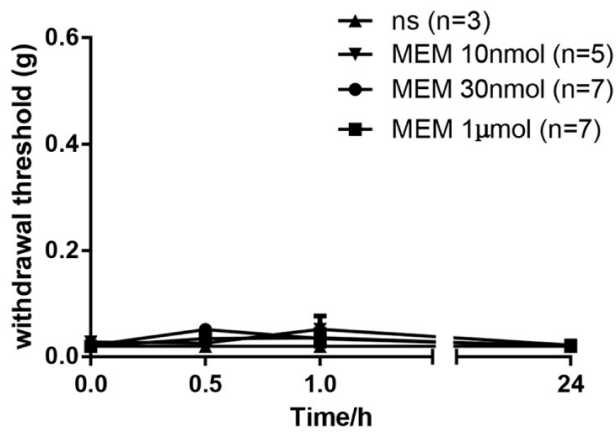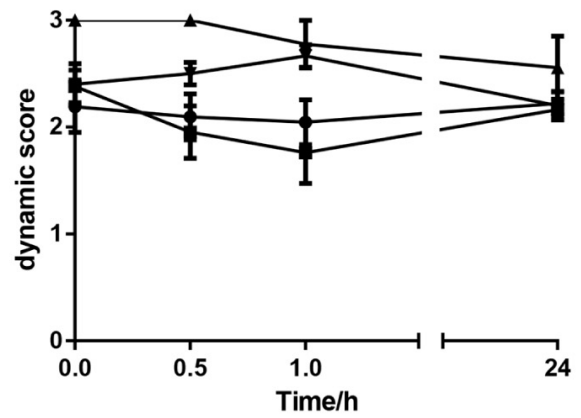

### Supplementary Figure 3

Three doses of MEM were intrathecal administrated at postoperative day 7.

The time course of MEM (three doses) all showed no significant effective on both dynamic allodynia and punctate allodynia t postoperative day 7 (two-way ANOVA with Bonferroni posthoc) Graphs represent the mean response  $\pm$  SEM. (NS, n=3; MEM 10, n=5; MEM 30, n=7; MEM 1 $\mu$ mol, n=7).
